# Supplementary material
Source: PubMed Central journal article supplement (PMC4004312)
Supplement: nn405240g_si_001.pdf [file nn405240g_si_001.pdf]

# Nanostructuring of Biosensing Electrodes with Nanodiamonds For Protein Immobilization with Chemical Stability

*Wenli Zhang<sup>‡</sup>, Kush Patel<sup>‡</sup>, Andrew Schexnider, Shirin Banu, Adarsh D. Radadia\*.*

Institute for Micromanufacturing, Center for Biomedical Engineering and Rehabilitation  
Services, Louisiana Tech University, Ruston, LA 71272.

**Supporting Information**

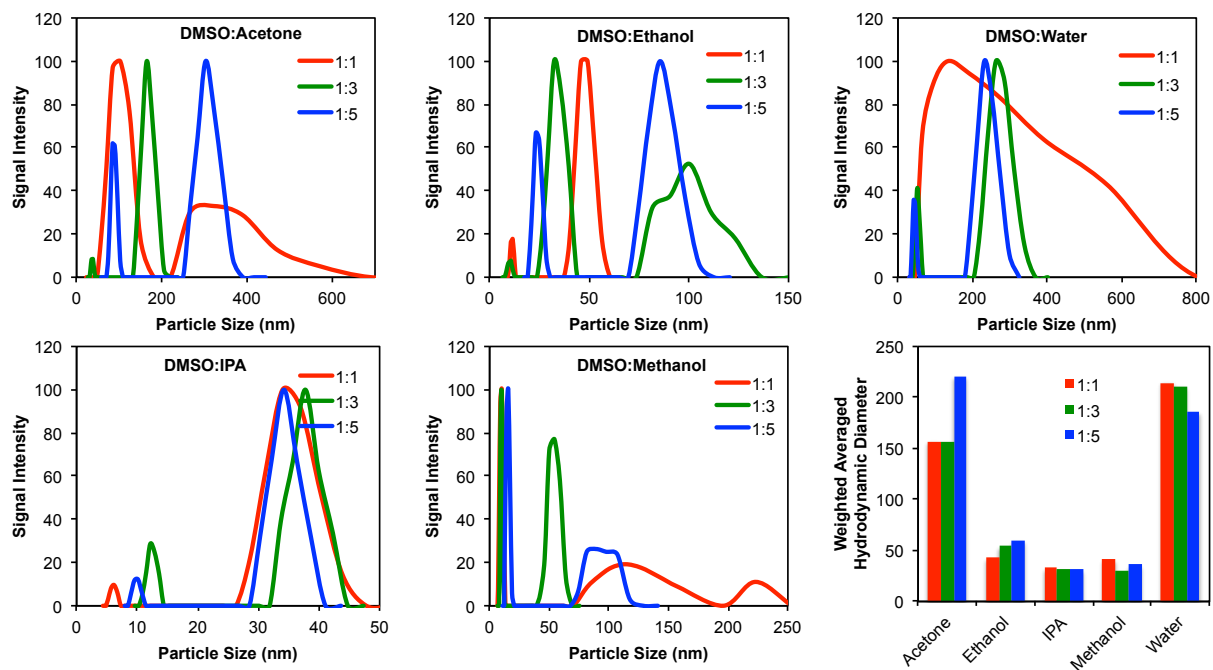

**Figure S1.** Results from photon correlation spectroscopy showing size distribution of ND aggregates obtained by diluting the original ND:DMSO solution with acetone, ethanol, water, IPA, and methanol.

**Table S1.** Properties of solvent mixtures estimated from molar ratio weighted calculations.

| Solvent  | Dilution Ratio | Molar Ratio | Dielectric Constant | Refractive Index | Density g/ml | Viscosity mPa-s |
|----------|----------------|-------------|---------------------|------------------|--------------|-----------------|
| Acetone  | 1:1            | 0.4919      | 34.0572             | 1.4200           | 0.9390       | 0.5802          |
|          | 1:3            | 0.7439      | 27.5817             | 1.3897           | 0.8625       | 0.4225          |
|          | 1:5            | 0.8288      | 25.3997             | 1.3795           | 0.8370       | 0.3870          |
| Ethanol  | 1:1            | 0.5506      | 34.5036             | 1.4140           | 0.9405       | 1.4465          |
|          | 1:3            | 0.7861      | 29.2870             | 1.3862           | 0.8648       | 1.2705          |
|          | 1:5            | 0.8597      | 27.6580             | 1.3776           | 0.8395       | 1.2239          |
| IPA      | 1:1            | 0.4831      | 32.8357             | 1.4297           | 0.9385       | 2.2453          |
|          | 1:3            | 0.7371      | 25.5455             | 1.4038           | 0.8618       | 2.3049          |
|          | 1:5            | 0.8237      | 23.0594             | 1.3950           | 0.8362       | 2.3259          |
| Methanol | 1:1            | 0.6385      | 37.9524             | 1.3826           | 0.9415       | 0.8028          |
|          | 1:3            | 0.8412      | 35.1749             | 1.3520           | 0.8663       | 0.6699          |
|          | 1:5            | 0.8983      | 34.3934             | 1.3434           | 0.8412       | 0.6401          |
| Water    | 1:1            | 0.7985      | 73.2897             | 1.3624           | 1.0450       | 1.1253          |
|          | 1:3            | 0.9224      | 77.4161             | 1.3443           | 1.0215       | 1.0481          |
|          | 1:5            | 0.9520      | 78.4000             | 1.3400           | 1.0137       | 1.0313          |

**Table S2.** Equivalent Circuit Fit Values For The Other Two Active Sensors.

| Parameters | Active Sensor 2                                        |                                           |                                           | Active Sensor 3                                        |                                           |                                           |
|------------|--------------------------------------------------------|-------------------------------------------|-------------------------------------------|--------------------------------------------------------|-------------------------------------------|-------------------------------------------|
|            | After antibody immobilization and blocking with casein | After capture from 10 <sup>6</sup> cfu/ml | After capture from 10 <sup>8</sup> cfu/ml | After antibody immobilization and blocking with casein | After capture from 10 <sup>6</sup> cfu/ml | After capture from 10 <sup>8</sup> cfu/ml |
| R1 (Ω)     | 13,591                                                 | 9,148                                     | 8,269                                     | 21,655                                                 | 13,498                                    | 10,105                                    |
| R3 (Ω)     | 1,774                                                  | 1,170                                     | 1,039                                     | 1,720                                                  | 1,055                                     | 925                                       |
| Ws1-R (Ω)  | 489,690                                                | 469,680                                   | 480,090                                   | 721,470                                                | 612,930                                   | 648,700                                   |
| Ws1-T      | 5.02 x 10 <sup>-3</sup>                                |                                           |                                           | 5.07 x 10 <sup>-3</sup>                                |                                           |                                           |
| Ws1-P      | 0.7679                                                 |                                           |                                           | 0.73527                                                |                                           |                                           |
| R2 (Ω)     | 25                                                     |                                           |                                           | 25                                                     |                                           |                                           |
| C1 (F)     | 2.75 x 10 <sup>-9</sup>                                |                                           |                                           | 2.10 x 10 <sup>-9</sup>                                |                                           |                                           |
| C2 (F)     | 1.46 x 10 <sup>-9</sup>                                |                                           |                                           | 1.55 x 10 <sup>-9</sup>                                |                                           |                                           |

**Table S3.** Equivalent Circuit Fit Values For The Other Control Sensor.

| <b>Control Sensor 2</b> |                                                               |                                                 |                                                 |
|-------------------------|---------------------------------------------------------------|-------------------------------------------------|-------------------------------------------------|
| <b>Parameters</b>       | <b>After antibody immobilization and blocking with casein</b> | <b>After capture from 10<sup>6</sup> cfu/ml</b> | <b>After capture from 10<sup>8</sup> cfu/ml</b> |
| R3 ( $\Omega$ )         | 1,773                                                         | 1,348                                           | 1,077                                           |
| Ws1-R ( $\Omega$ )      | $1.13 \times 10^6$                                            | $9.5 \times 10^5$                               | $9.3 \times 10^5$                               |
| Ws1-T                   |                                                               | $8.6 \times 10^{-3}$                            |                                                 |
| Ws1-P                   |                                                               | 0.54                                            |                                                 |
| R2 ( $\Omega$ )         |                                                               | 25                                              |                                                 |
| C1 (F)                  |                                                               | $2.1 \times 10^{-9}$                            |                                                 |
| C2 (F)                  |                                                               | $1.3 \times 10^{-9}$                            |                                                 |
| R1 ( $\Omega$ )         |                                                               | $1 \times 10^{-7}$                              |                                                 |
